# Supplementary material for: Tempol Moderately Extends Survival in a hSOD1G93A ALS Rat Model by Inhibiting Neuronal Cell Loss, Oxidative Damage and Levels of Non-Native hSOD1G93A Forms
Source: PubMed Central journal article supplement (PMC3566093; doi:10.1371/journal.pone.0055868), 2013-02-06
Supplement: pone.0055868.s001.pdf [file pone.0055868.s001.pdf]

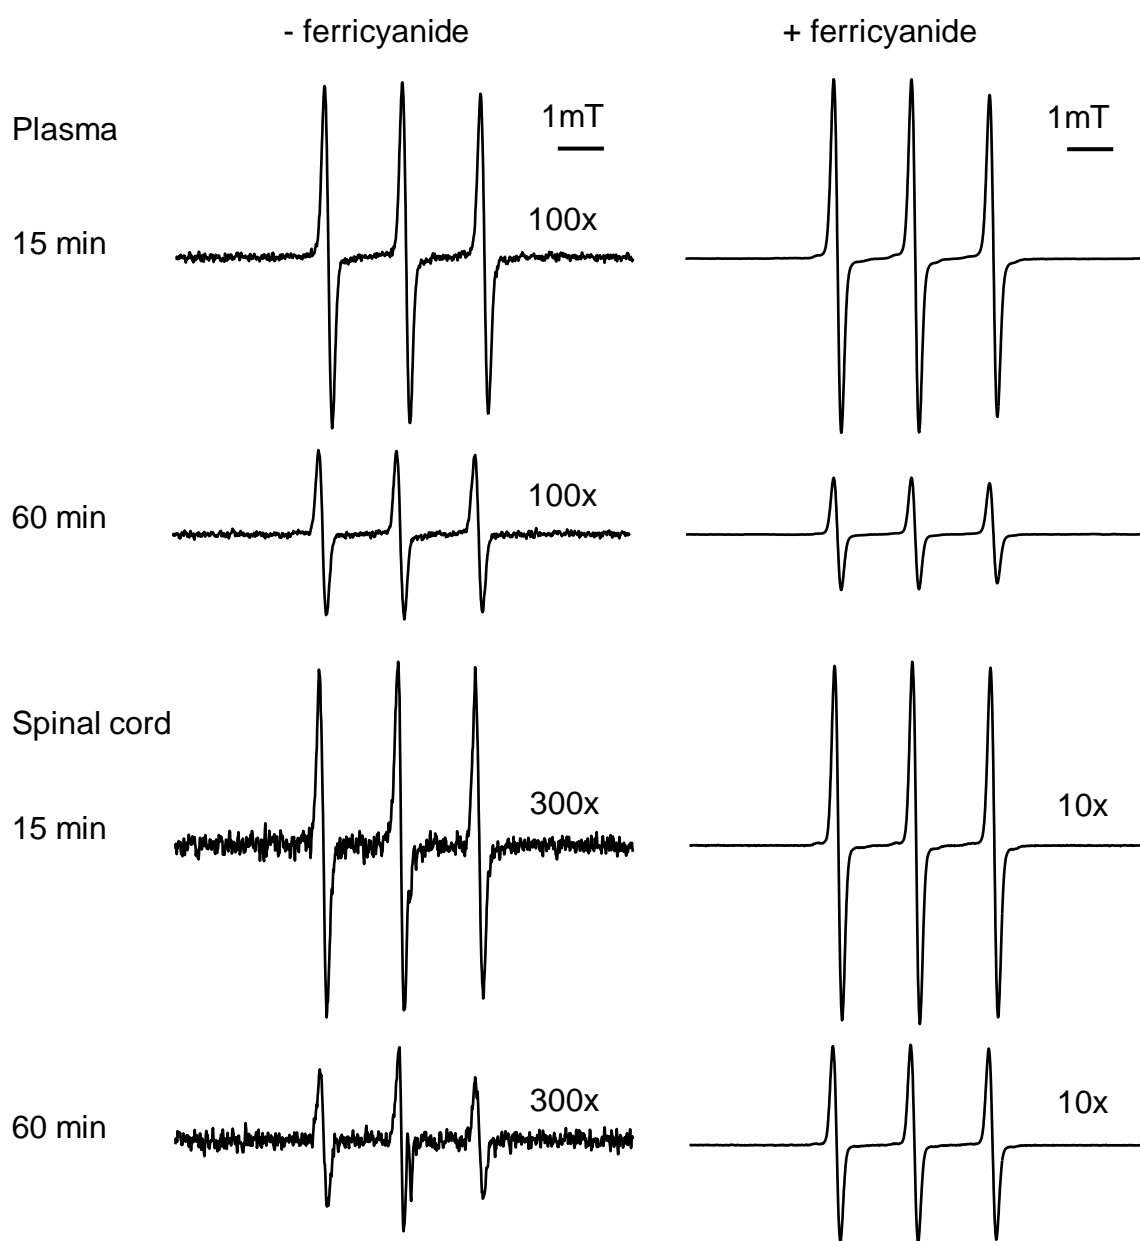

**Figure S1. Representative EPR spectra of tissues of G93A rats treated with i.p. tempol.** The animals received tempol i.p. (26 mg/rat) and were euthanized at the different times specified in the figure. The spectrum of each sample was scanned before and after the addition of 1 mM ferricyanide. Instrumental conditions: microwave power, 10 mW; modulation amplitude, 0.1 mT; time constant, 163 ms; scan rate, 0.060 mT/s.
